# Supplementary material
Source: MDPI journal article supplement (https://www.mdpi.com/2073-4344/13/2/304)
Supplement: s1 [file s1]

Supplementary Materials

# Ring-Opening Polymerization of *rac*-Lactide Catalyzed by Octahedral Nickel Carboxylate Complexes

Alexey Nikiforov <sup>1</sup>, Natalia Panina <sup>2</sup>, Daniil Blinou <sup>3</sup>, Vladislav Gurzhiy <sup>4</sup>, Juliya Nashchekina <sup>5</sup>, Evgenia Korzhikova-Vlakh <sup>1,4,\*</sup>, Alexey Eremin <sup>1</sup> and Mariia Stepanova <sup>1,\*</sup>

<sup>1</sup> Institute of Macromolecular Compounds, Russian Academy of Sciences, St. Petersburg 199004, Russia

<sup>2</sup> Department of Inorganic Chemistry, Saint-Petersburg State Institute of Technology (Technical University), St. Petersburg, 190013, Russia

<sup>3</sup> Kurnakov Institute of General and Inorganic Chemistry, Russian Academy of Sciences, Moscow, 119991, Russia

<sup>4</sup> Saint-Petersburg State University, St. Petersburg, 199034, Russia

<sup>5</sup> Institute of Cytology, Russian Academy of Sciences, St. Petersburg 194064, Russia

\* Correspondence: vlakh@hq.macro.ru (E.K.-V.); maristepanova@hq.macro.ru (M.S.)

**Table S1.** Geometric parameters of intramolecular hydrogen bonds in compounds *trans*-[Ni(DBED)<sub>2</sub>(O<sub>2</sub>CCF<sub>3</sub>)<sub>2</sub>] $\cdot$ C<sub>6</sub>H<sub>6</sub> - **1** and *trans*-[Ni(DBED)<sub>2</sub>(O<sub>2</sub>CC(CH<sub>3</sub>)<sub>3</sub>)<sub>2</sub>] $\cdot$ (CH<sub>3</sub>)<sub>3</sub>CCO<sub>2</sub>H - **2** (DBED – *N,N'*-dibenzylethylenediamine).

| Compound | Donor (D) | Acceptor (A) | D-H (Å) | H $\cdots$ A (Å) | D $\cdots$ A (Å) | D-H $\cdots$ A (°) |
|----------|-----------|--------------|---------|------------------|------------------|--------------------|
| 1        | N2-H2     | O2           | 0.98    | 2.003            | 2.893            | 150.0              |
| 2        | N2-H2     | O5           | 0.98    | 2.252            | 3.001            | 132.5              |
| 2        | N1-H1     | O5           | 0.98    | 2.195            | 2.988            | 137.2              |
| 2        | N1-H1     | O5A          | 0.98    | 2.195            | 2.862            | 144.9              |

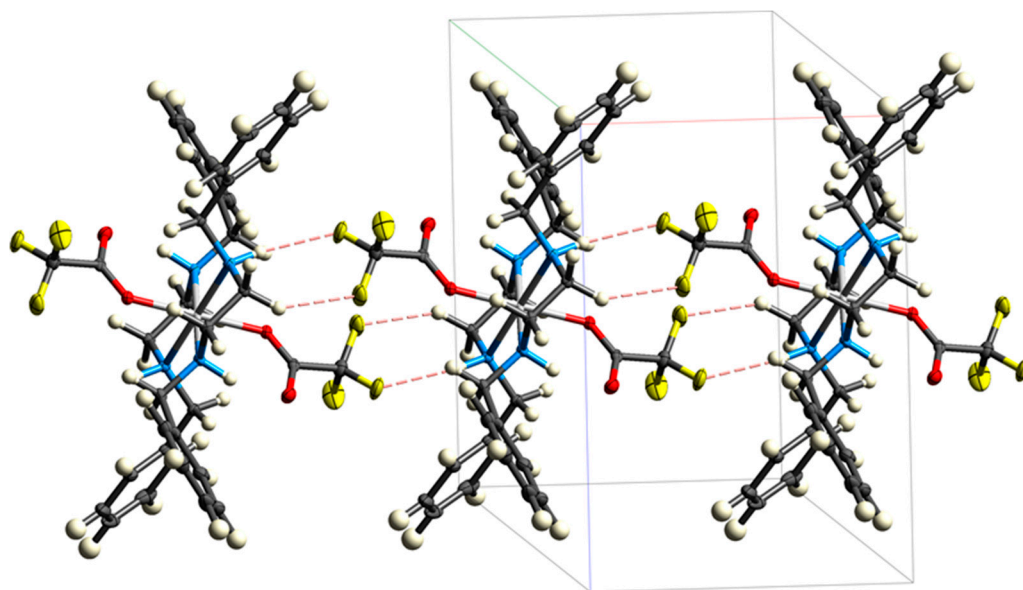

**Figure S1.** C-H $\cdots$ F and N-H $\cdots$ F close contacts in crystal structure of **1**.

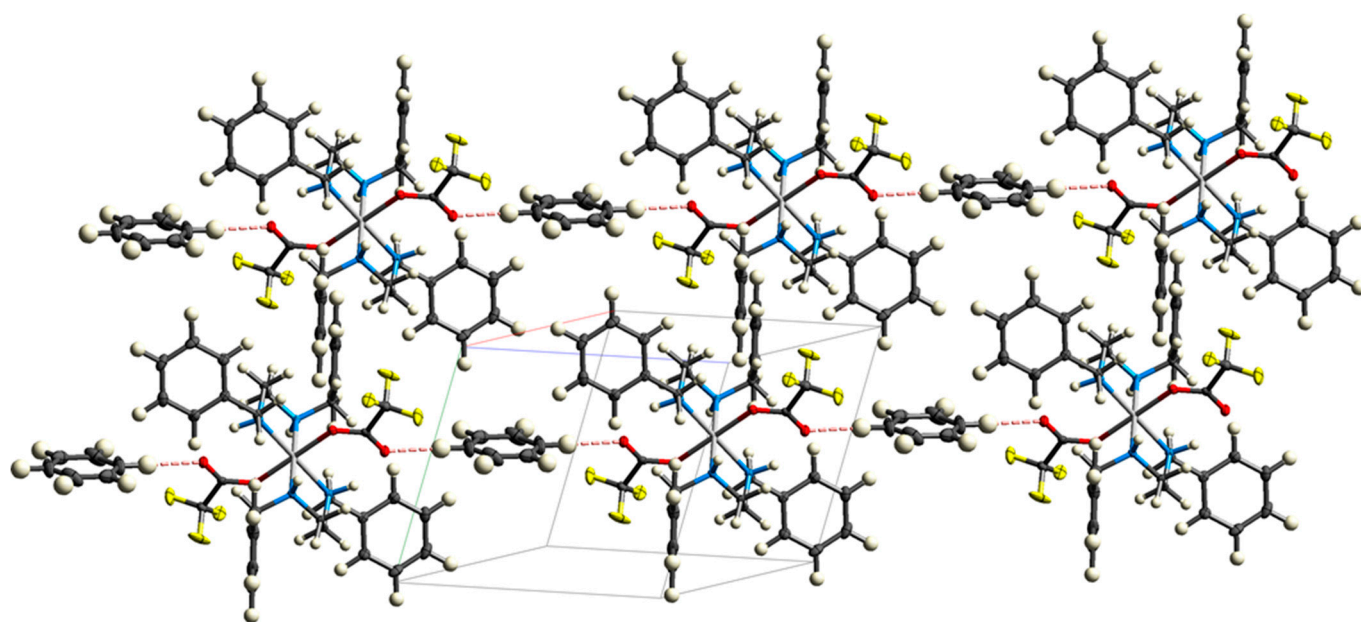

**Figure S2.** Network system C-H...O hydrogen bonds of complex units with solvate molecules of benzene in the crystal structure of compound 1.

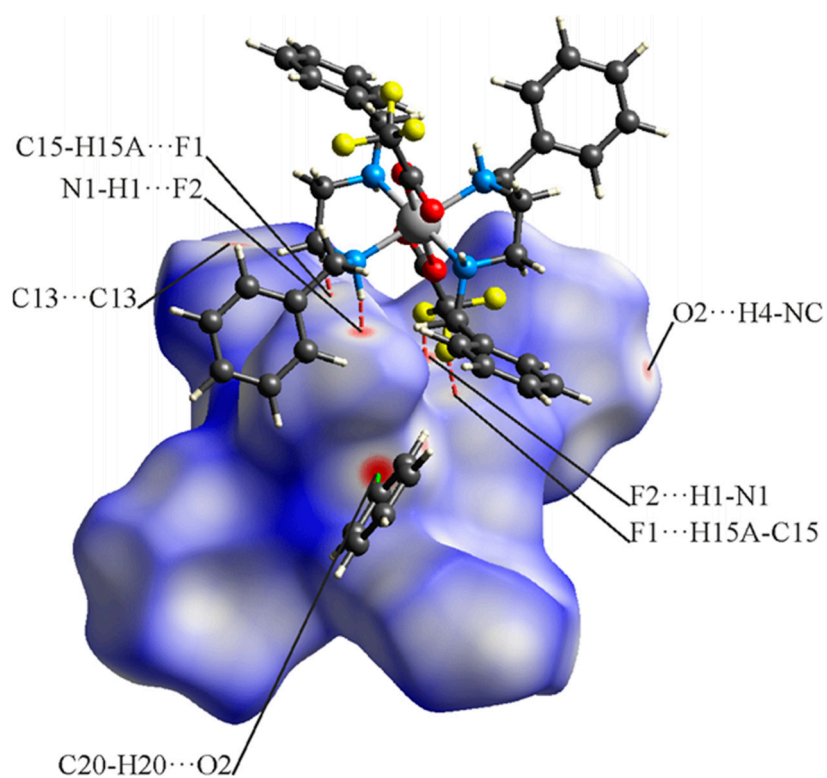

**Figure S3.** Hirshfeld surfaces (HS) of complex 1 over the  $d_{\text{norm}}$  map in the range  $-0.2399$ – $1.5851$  a.u.

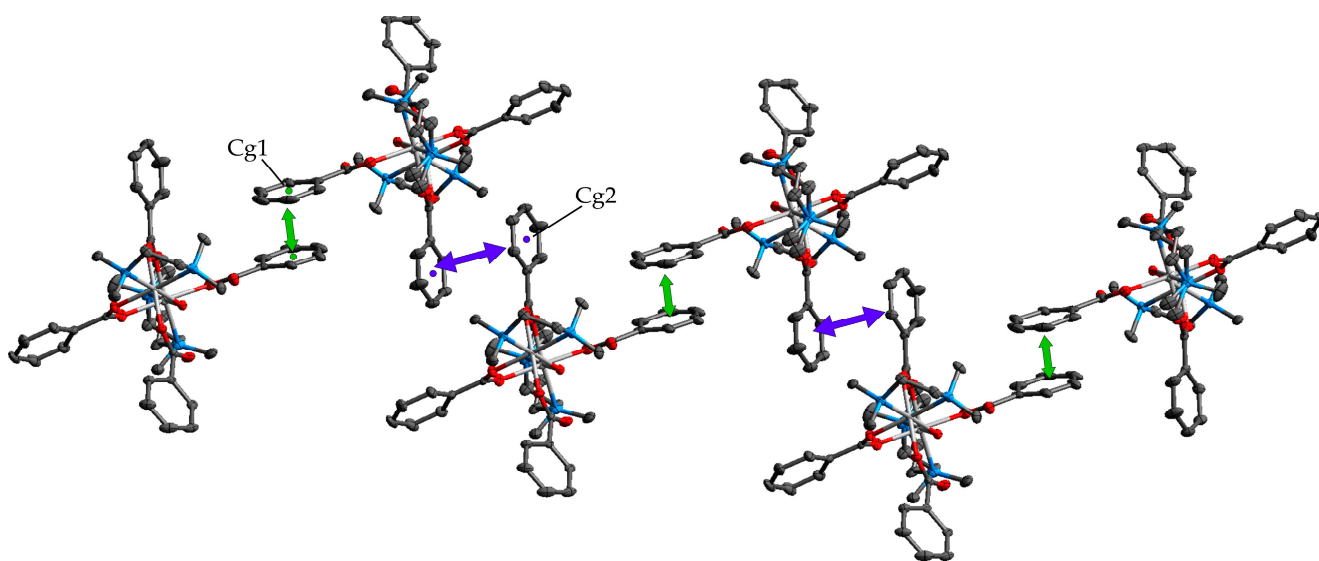

**Figure S4.** Fragment of the crystal structure of  $[\text{Ni}_2(\mu\text{-OH}_2)(\mu\text{-O}_2\text{CC}_6\text{H}_5)_2(\text{O}_2\text{CC}_6\text{H}_5)_2(\text{TEMED})_2]$  (TEMED—*N,N,N',N'*-tetramethylethylenediamine) - 4: offset-face-to-face  $\pi\cdots\pi$  stacking interactions of phenyl substituents of benzoate ligands.

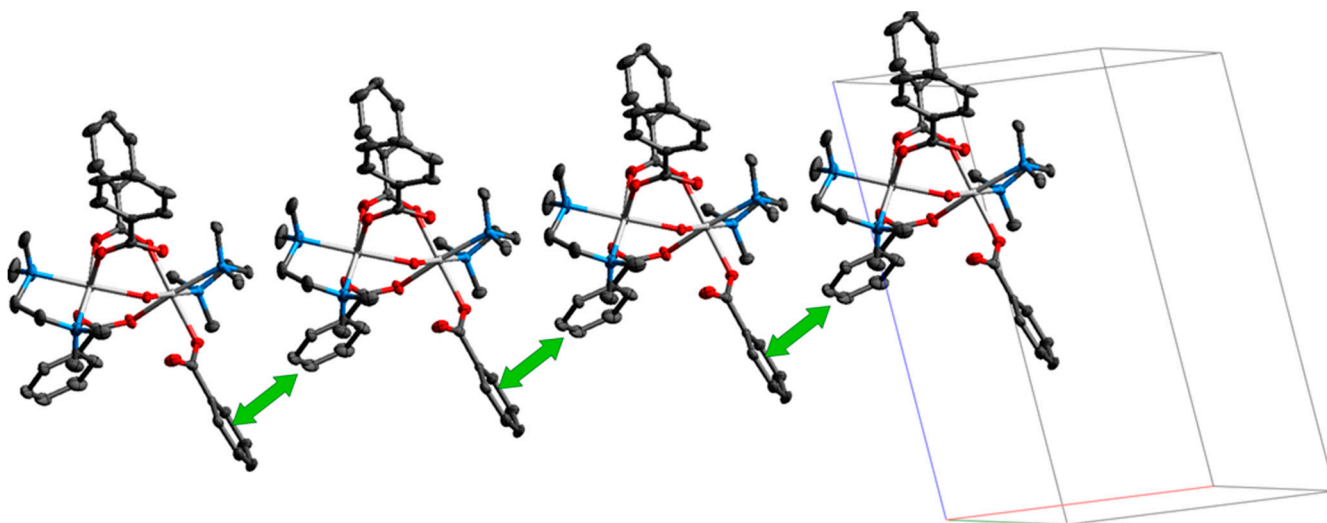

**Figure S5.** Fragment of the crystal structure of complex 4: C-H $\cdots\pi$  face-to-plane interactions of phenyl substituents of benzoate ligands (the compound unit cell is shown).

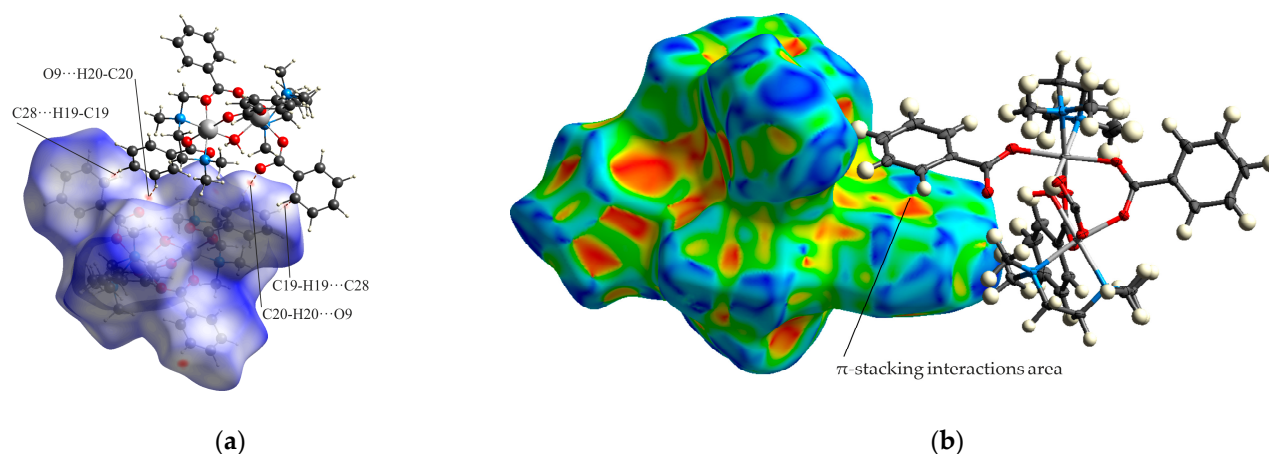

**Figure S6.** HS of 4: (a) over the  $d_{\text{norm}}$  map in the range  $-0.1278 - 1.5984$  a.u., (b) over the shape index map.

**Table S2.** Some values of average Ni-N and Ni-O bond lengths for complexes 1–4.

|                                              | Bond length (average) (Å) |                                  |                 |                               |
|----------------------------------------------|---------------------------|----------------------------------|-----------------|-------------------------------|
|                                              | 1                         | 2                                | 3 [S1]          | 4                             |
| L                                            | DBED                      | DBED                             | TEMED           | TEMED                         |
| R                                            | CF <sub>3</sub>           | C(CH <sub>3</sub> ) <sub>3</sub> | CF <sub>3</sub> | C <sub>6</sub> H <sub>5</sub> |
| Ni – (L-k <sup>2</sup> N,N')                 | 2.120                     | 2.157                            | 2.162           | 2.172                         |
| Ni – (O <sub>2</sub> CR-kO)                  | 2.094                     | 2.066                            | 2.104           | 2.093                         |
| Ni – (O <sub>2</sub> CR-k <sup>2</sup> O,O') | –                         | –                                | 2.064           | 2.029                         |
| Ni – (μ-OH <sub>2</sub> )                    | –                         | –                                | 2.154           | 2.084                         |

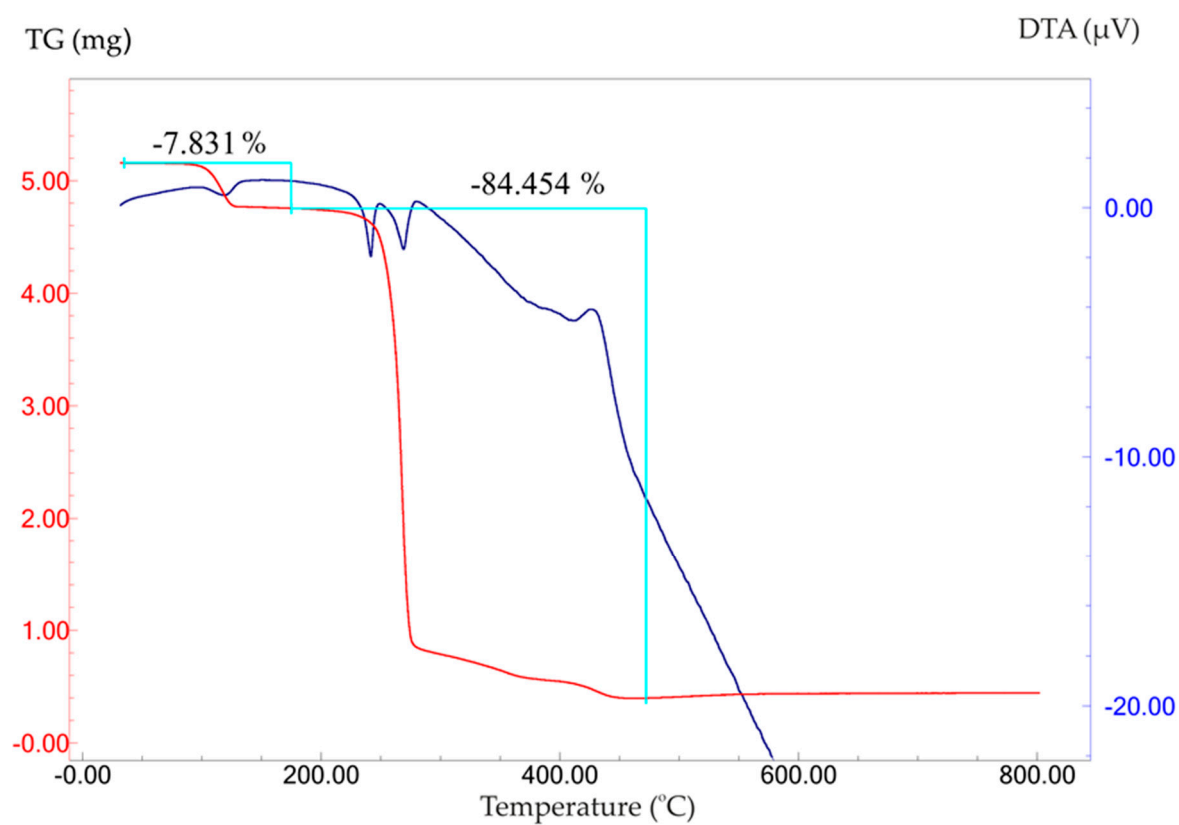**Figure S7.** Thermogravimetric analysis (TGA) of complex 1.

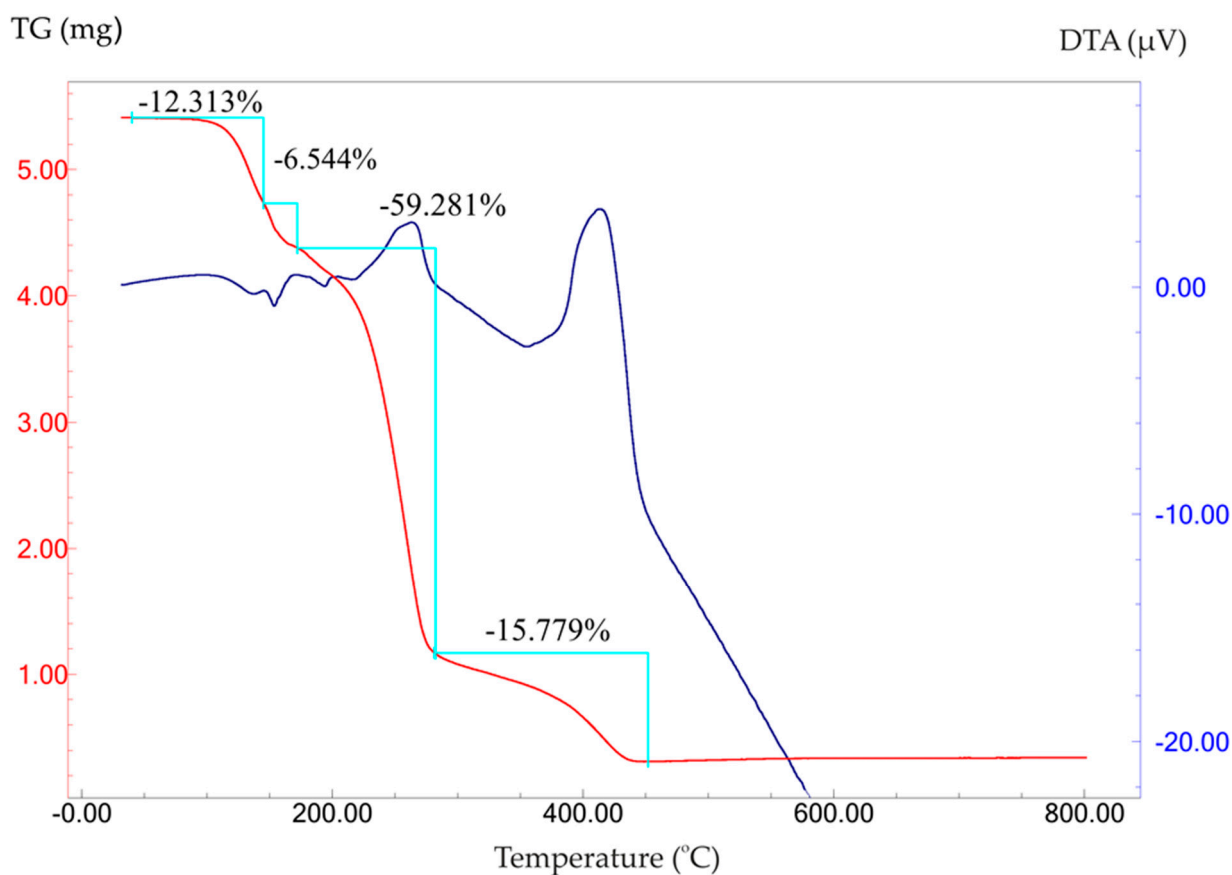

Figure S8. TGA of complex 2.

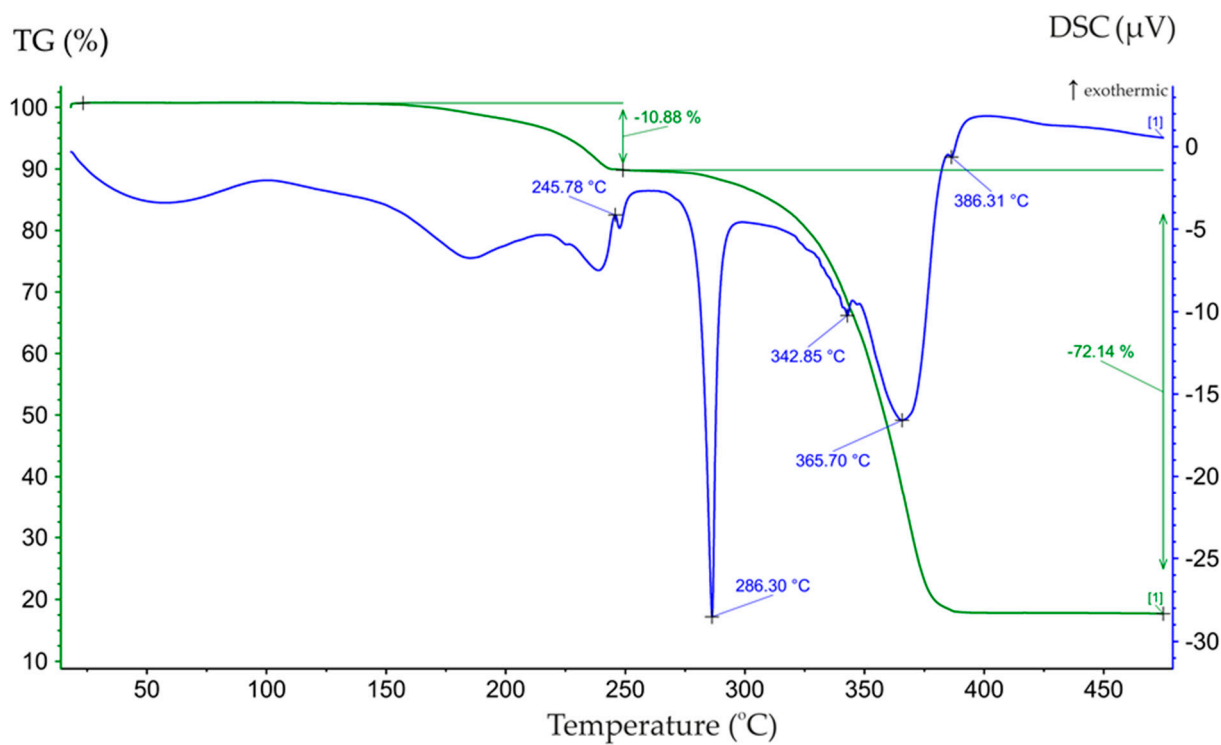

Figure S9. Simultaneous thermal analysis of complex 4.

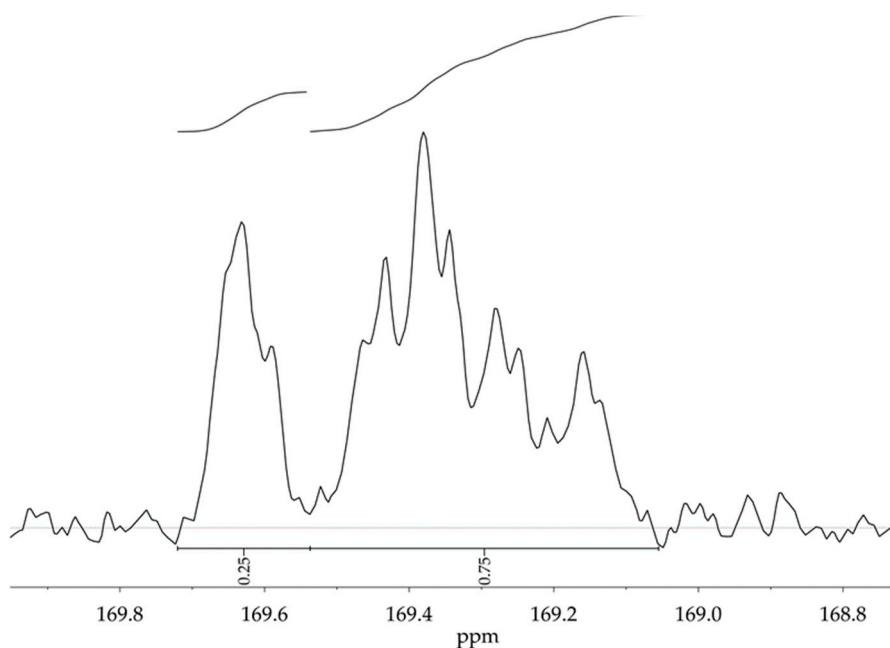

**Figure S10.** Fragment of carbonyl region of  $^{13}\text{C}$  NMR spectrum in  $\text{CDCl}_3$  of precipitated poly-D,L-lactide, obtained with compound **2**. Reaction conditions:  $[\text{rac-lactide}]/[\text{Ni}]$  250/1, toluene, 72 h, 140 °C, argon atmosphere.

**Table S3.** Calculated molecular formulas and masses of dialkyl lactamide species in electrospray ionization (ESI) mass-spectra of model reaction mixture ( $[\text{rac-lactide}]/[\text{Ni}]$  –3/1, toluene, 72 h, 140 °C, argon atmosphere).

| n | ((DBED)(Lac) <sub>n</sub> (CO))+Na <sup>+</sup> |                  | ((DBED)(Lac) <sub>n</sub> (CO)+C <sub>2</sub> H <sub>4</sub> -O)+Na <sup>+</sup> |                  |
|---|-------------------------------------------------|------------------|----------------------------------------------------------------------------------|------------------|
|   | m/z(experimental)                               | m/z(theoretical) | m/z(experimental)                                                                | m/z(theoretical) |
| 1 | 363.1689                                        | 363.1685         | not detected                                                                     | 375.2048         |
| 2 | 435.1902                                        | 435.1896         | not detected                                                                     | 447.2260         |
| 3 | 507.2115                                        | 507.2107         | 519.2479                                                                         | 519.2471         |
| 4 | 579.2333                                        | 579.2318         | 591.2692                                                                         | 591.2682         |
| 5 | 651.2553                                        | 651.2530         | 663.2904                                                                         | 663.2894         |
| 6 | 723.2791                                        | 723.2741         | 735.3123                                                                         | 735.3105         |
| 7 | 795.3015                                        | 795.2952         | 807.3340                                                                         | 807.3316         |
| 8 | not detected                                    | 867.3164         | 879.3560                                                                         | 879.3527         |
| 9 | 939.3479                                        | 939.3375         | 951.3783                                                                         | 951.3738         |

Lac - lactoyl  $\text{OCH}_2\text{CHCO}$  group.



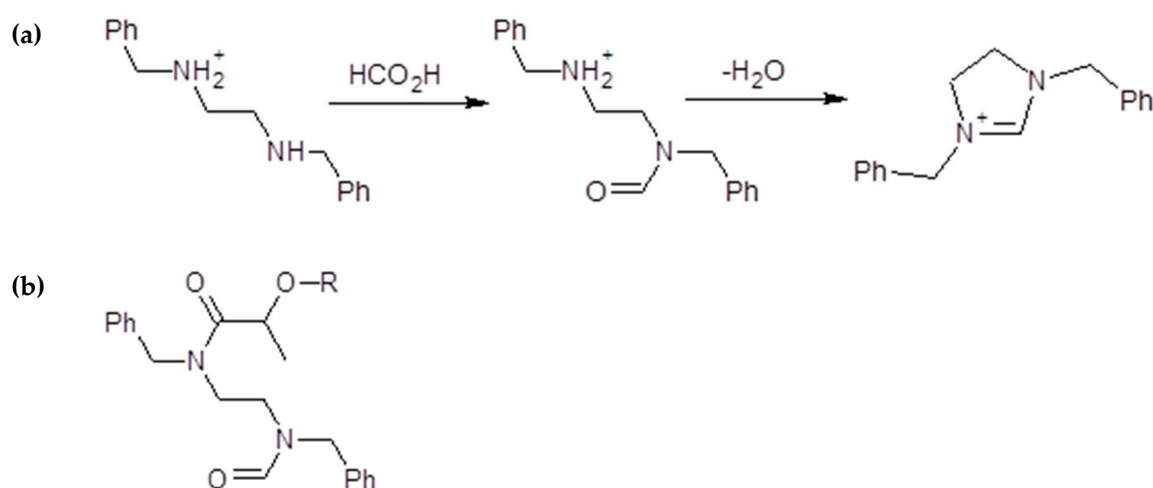

**Figure S11.** Proposed transformation pathway of DBED ligand (a) and structure of [(DBED)(Lac)<sub>n</sub>(CO)] formylated dialkyl lactamide species (b) in ESI mass spectrometry experiment.

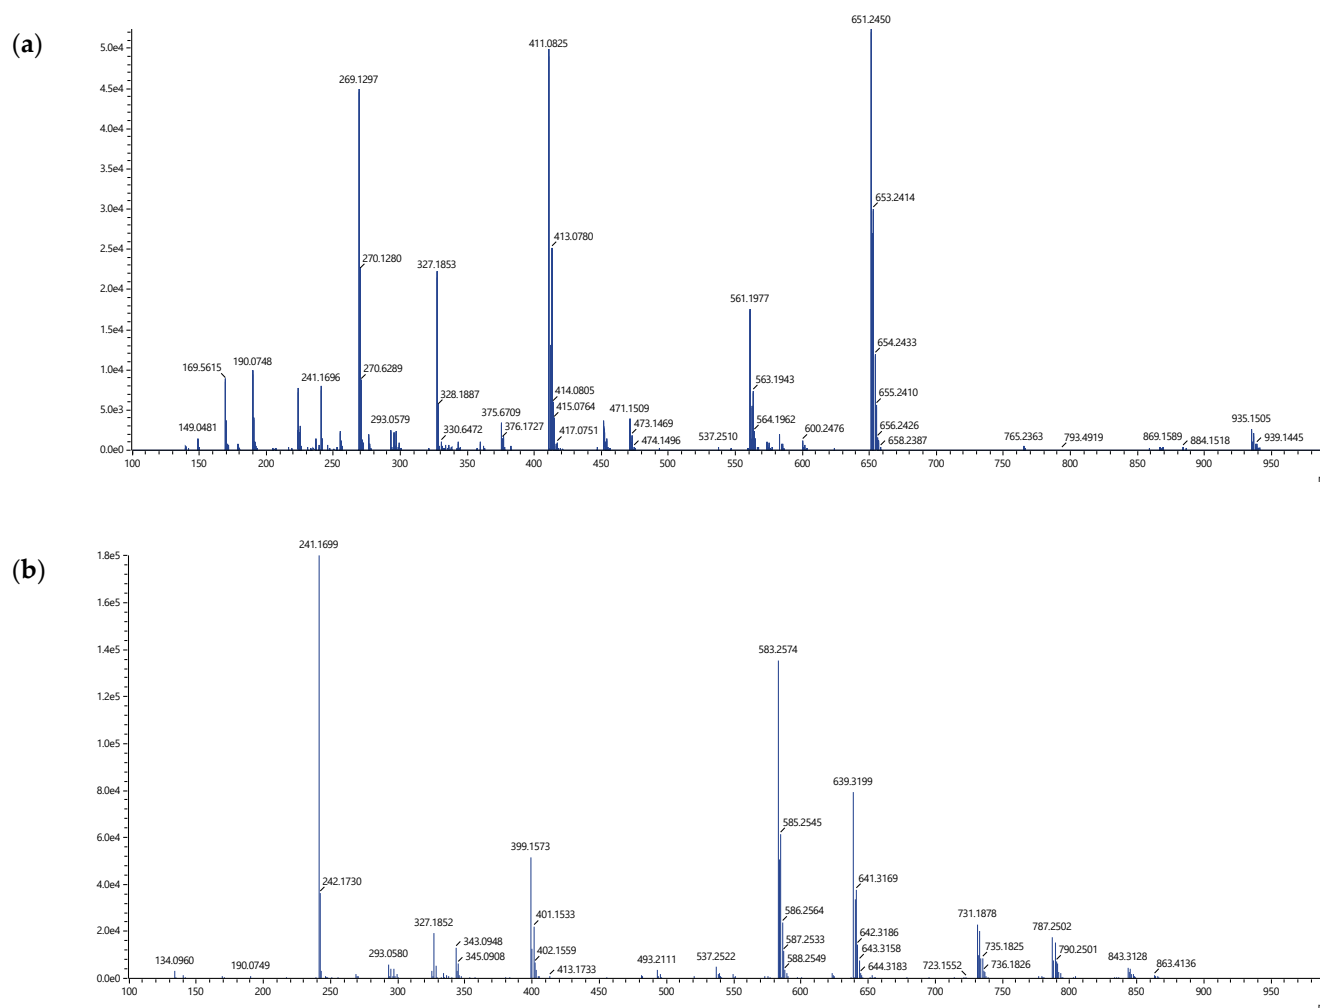

**Figures S12.** ESI mass-spectra of 1 (a) and 2 (b).

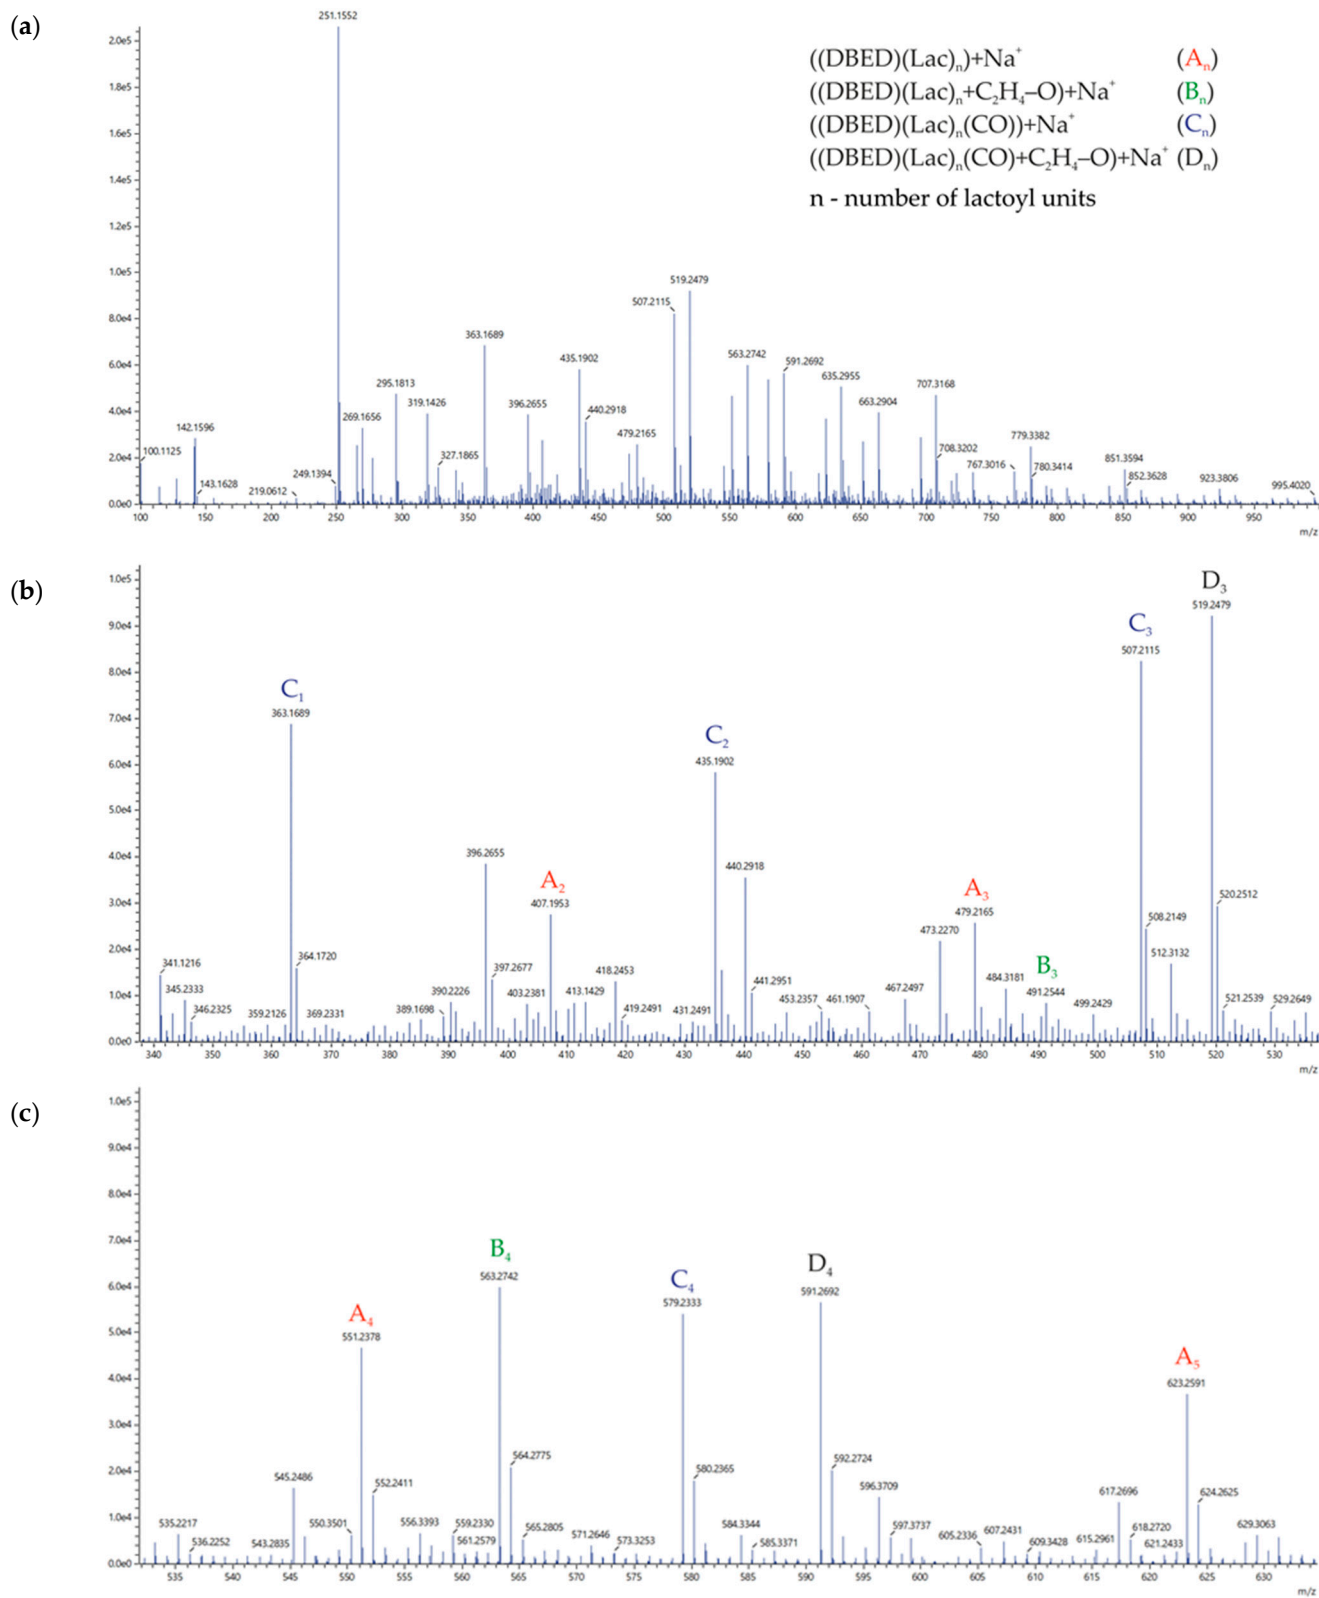



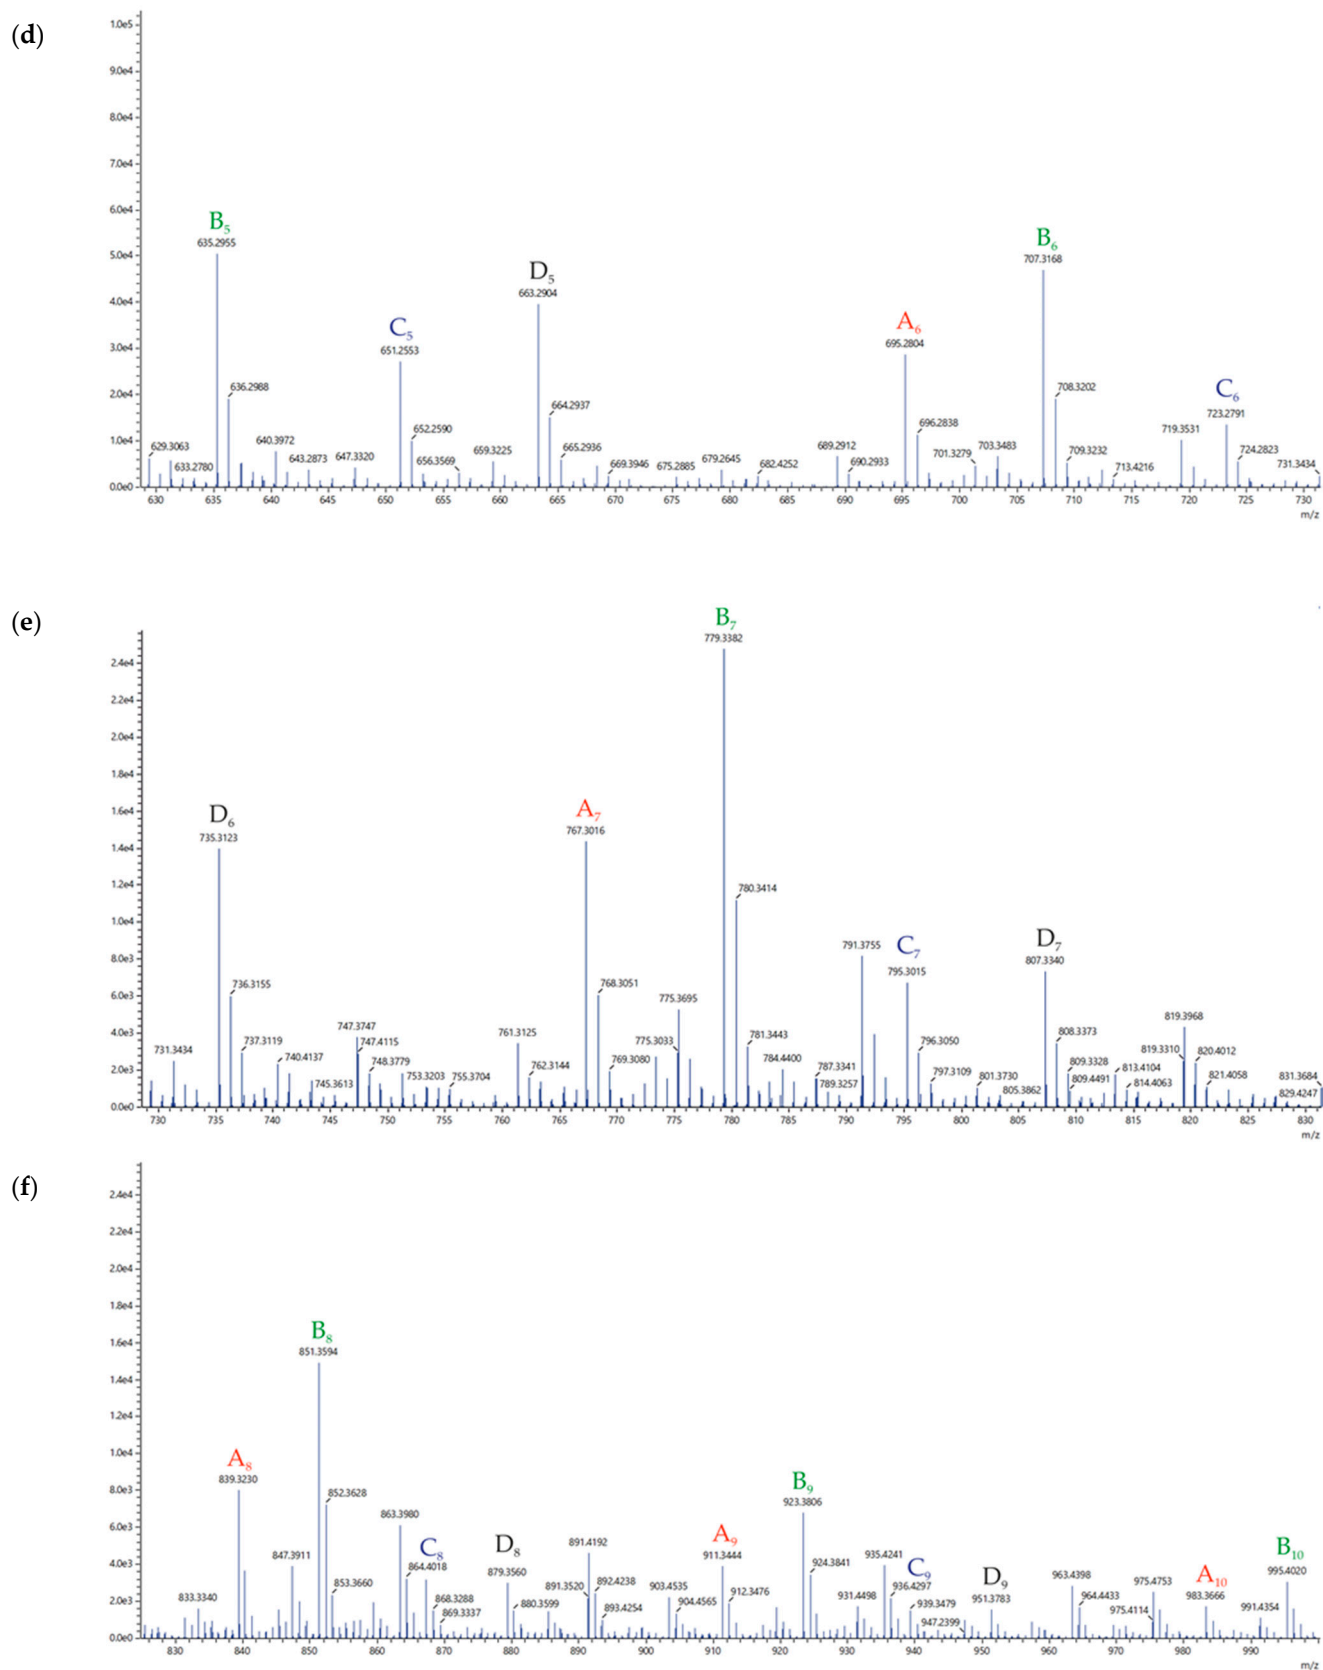

**Figures S13.** Electrospray ionization mass-spectra of model polymerization mixtures ( $[rac\text{-lactide}]/[\text{Ni}] = 3/1$ , toluene, 72h, 140°C, argon atmosphere): (a) general view (100–1000  $m/z$ ), (b) part of the spectrum (338–538  $m/z$ ), (c) part of the spectrum (532–635  $m/z$ ), (d) part of the spectrum (628–731  $m/z$ ), (e) part of the spectrum (728–831  $m/z$ ), (f) (824–1000  $m/z$ ).

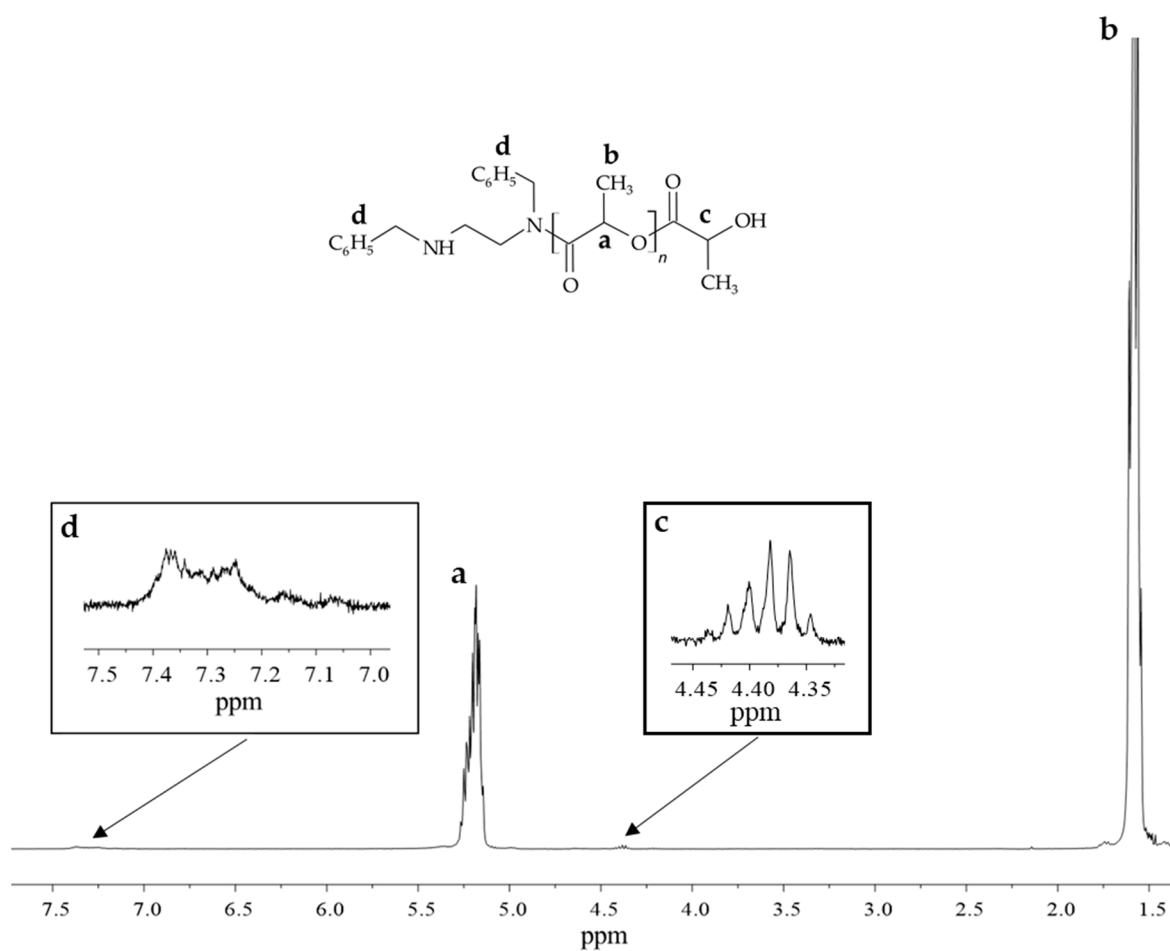

**Figure S14.**  $^1\text{H}$  1D DOSY NMR spectrum in  $\text{CDCl}_3$  of precipitated poly-D,L-lactide, obtained with compound **2** (gradient intensity 90%). Reaction conditions:  $[\text{rac-lactide}]/[\text{Ni}]$  250/1, toluene, 72 h, 140  $^\circ\text{C}$ , argon atmosphere.

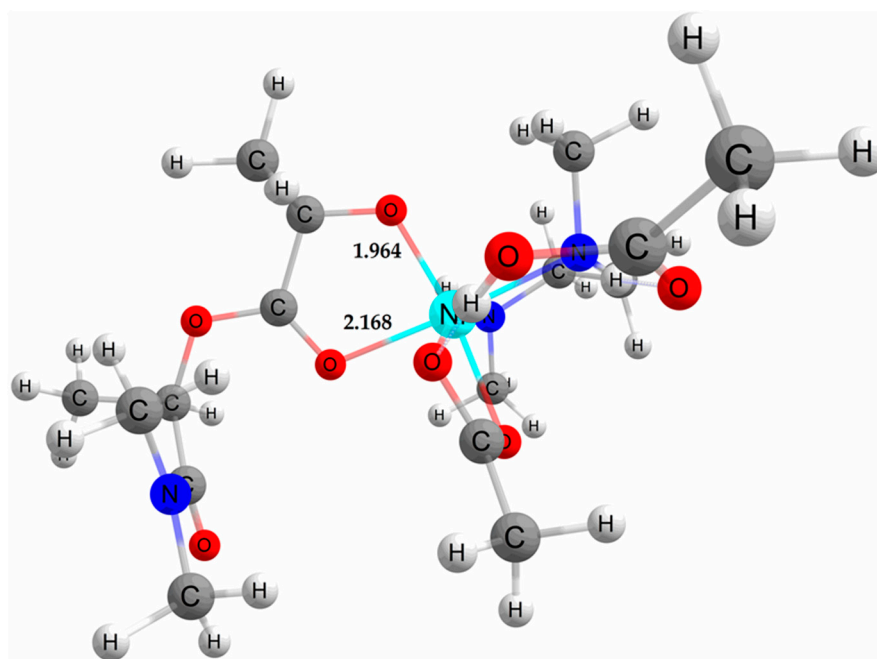

**Figure S15.** Optimized structure of the **X** compound. Bond lengths are given in  $\text{\AA}$ .

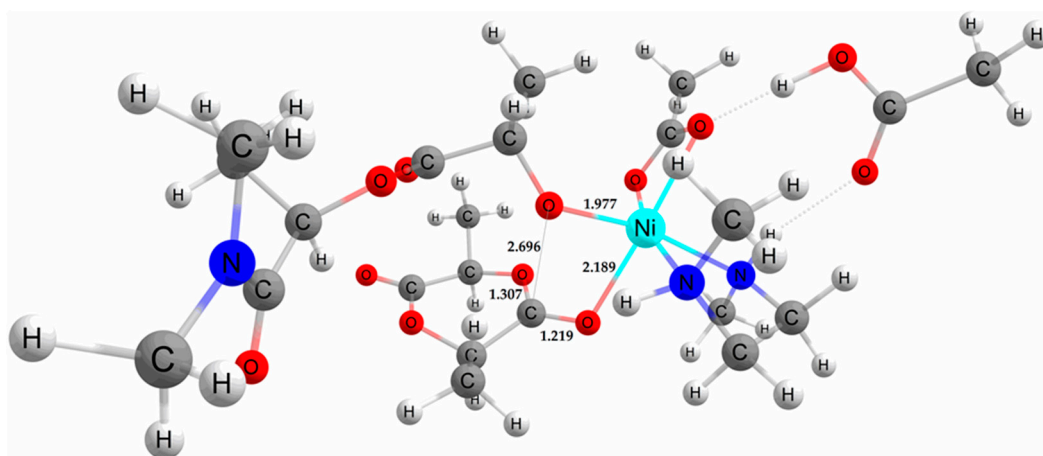

**Figure S16.** Optimized structure of the **XI** compound. Bond lengths are given in Å.

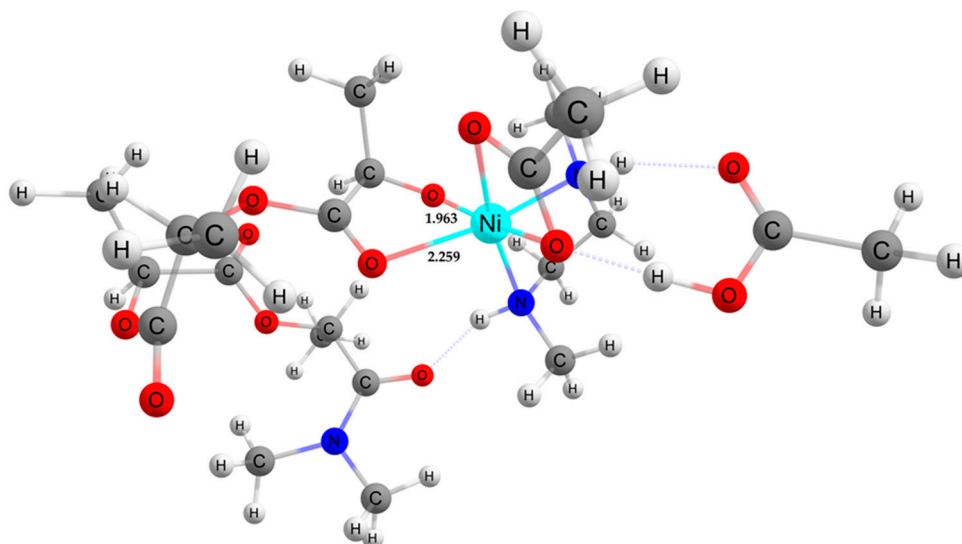

**Figure S17.** Optimized structure of the **XIII** compound. Bond lengths are given in Å.

## References

- S1. Ahlgrén, M.; Turpeinen, U. The Structure of  $\mu$ -Aqua-Bis( $\mu$ -Trifluoroacetato-O,O')-Bis[(*N,N,N',N'*-Tetramethylethylenediamine)(Trifluoroacetato)Nickel(II)]. *Acta Crystallogr B* **1982**, *38*, 276–279, doi:10.1107/s0567740882002611.
